# Supplementary material for: Planar tetracoordinate beryllium compounds with a partially covalent Be–Ng bond
Source: Royal Society of Chemistry journal article supplement (doi:10.1039/d4cp00468j), 2024-01-01
Supplement: d4cp00468j2.pdf [file d4cp00468j2.pdf]

## Planar Tetracoordinate Beryllium compounds with a partially covalent Be–Ng bond

Alejandro Vásquez–Espinal<sup>1</sup>; Ricardo Pino–Rios\*<sup>1,2</sup>

<sup>1</sup>Química y Farmacia, Facultad de Ciencias de la Salud, Universidad Arturo Prat. Casilla 121, Iquique 1100000, Chile. rpinoarios@unap.cl.

<sup>2</sup>Centro de Investigación Medicina de Altura – CEIMA, Universidad Arturo Prat. Casilla 121, Iquique 1100000, Chile.

### SUPPORTING INFORMATION

**Table S1.** Vibrational modes (in cm<sup>-1</sup>) computed at the CCSD(T)/def2-TZVP level.

| $\nu$ | BeH <sub>3</sub> He <sup>+</sup> | BeH <sub>3</sub> Ne <sup>+</sup> | BeH <sub>3</sub> Ar <sup>+</sup> | BeH <sub>3</sub> Kr <sup>+</sup> | BeH <sub>3</sub> Xe <sup>+</sup> | BeH <sub>3</sub> Rn <sup>+</sup> |
|-------|----------------------------------|----------------------------------|----------------------------------|----------------------------------|----------------------------------|----------------------------------|
| 1     | 178.9689                         | 167.1509                         | 288.5872                         | 298.9603                         | 317.2628                         | 315.2484                         |
| 2     | 277.3450                         | 226.5630                         | 330.6105                         | 321.8707                         | 334.7953                         | 352.5582                         |
| 3     | 358.8748                         | 291.4269                         | 387.5636                         | 376.5439                         | 369.4408                         | 369.1903                         |
| 4     | 387.0698                         | 389.4762                         | 461.0397                         | 469.8148                         | 488.3960                         | 503.2793                         |
| 5     | 461.4693                         | 441.7424                         | 548.5065                         | 561.2152                         | 578.1852                         | 588.4945                         |
| 6     | 927.4407                         | 912.9368                         | 835.2901                         | 814.3065                         | 788.1754                         | 768.8169                         |
| 7     | 1087.1397                        | 1076.3623                        | 1096.2433                        | 1099.9413                        | 1109.7799                        | 1112.7938                        |
| 8     | 2294.5637                        | 2290.9223                        | 2275.8393                        | 2266.2788                        | 2253.9624                        | 2246.0672                        |
| 9     | 4060.8522                        | 4072.4054                        | 4091.0738                        | 4093.6972                        | 4085.8644                        | 4083.1592                        |

**Table S2.** Moment of Inertia ( $I$ , in amu.Å<sup>2</sup>) computed at the CCSD(T)/def2-TZVP level.

| $I$ | BeH <sub>3</sub> He <sup>+</sup> | BeH <sub>3</sub> Ne <sup>+</sup> | BeH <sub>3</sub> Ar <sup>+</sup> | BeH <sub>3</sub> Kr <sup>+</sup> | BeH <sub>3</sub> Xe <sup>+</sup> | BeH <sub>3</sub> Rn <sup>+</sup> |
|-----|----------------------------------|----------------------------------|----------------------------------|----------------------------------|----------------------------------|----------------------------------|
| XX  | 70.5396                          | 41.0450                          | 24.6912                          | 18.9425                          | 15.1813                          | 13.4955                          |
| YY  | 30.1441                          | 13.3204                          | 9.4698                           | 7.5556                           | 6.3051                           | 5.7944                           |
| ZZ  | 52.6384                          | 19.7172                          | 15.3612                          | 12.5689                          | 10.7838                          | 10.1540                          |

**Table S3.** Rotational constants ( $B$ , in GHz) computed at the CCSD(T)/def2-TZVP level.

| $B$ | BeH <sub>3</sub> He <sup>+</sup> | BeH <sub>3</sub> Ne <sup>+</sup> | BeH <sub>3</sub> Ar <sup>+</sup> | BeH <sub>3</sub> Kr <sup>+</sup> | BeH <sub>3</sub> Xe <sup>+</sup> | BeH <sub>3</sub> Rn <sup>+</sup> |
|-----|----------------------------------|----------------------------------|----------------------------------|----------------------------------|----------------------------------|----------------------------------|
| XX  | 82.2934                          | 82.4607                          | 15.3612                          | 91.1154                          | 92.7804                          | 93.5009                          |
| YY  | 30.1441                          | 13.3197                          | 9.4698                           | 7.5556                           | 6.3051                           | 5.7944                           |
| ZZ  | 30.1441                          | 13.3197                          | 10.5871                          | 8.2388                           | 6.7648                           | 6.1772                           |

**Table S4.** Natural atomic charges and Wiberg bond index for all bonds in BeH<sub>3</sub>Ng<sup>+</sup>.

Calculations were performed at the CCSD/def2-TZVP level.

| Compound                         | Q <sub>Be</sub> | Q <sub>H</sub> | Q <sub>Ha</sub> | Q <sub>Hb</sub> | Q <sub>Ng</sub> | WBI <sub>Be-Ng</sub> | WBI <sub>Be-H</sub> | WBI <sub>Be-Ha</sub> | WBI <sub>Be-Hb</sub> |
|----------------------------------|-----------------|----------------|-----------------|-----------------|-----------------|----------------------|---------------------|----------------------|----------------------|
| BeH <sub>3</sub> <sup>+</sup>    | 1.32            | -0.44          | 0.06            | 0.06            | —               | —                    | 0.71                | 0.10                 | 0.10                 |
| BeH <sub>3</sub> He <sup>+</sup> | 1.34            | -0.49          | 0.09            | 0.02            | 0.04            | 0.06                 | 0.66                | 0.10                 | 0.09                 |
| BeH <sub>3</sub> Ne <sup>+</sup> | 1.35            | -0.49          | 0.09            | 0.01            | 0.04            | 0.05                 | 0.65                | 0.10                 | 0.08                 |
| BeH <sub>3</sub> Ar <sup>+</sup> | 1.31            | -0.52          | 0.08            | 0.00            | 0.13            | 0.42                 | 0.61                | 0.09                 | 0.07                 |
| BeH <sub>3</sub> Kr <sup>+</sup> | 1.28            | -0.52          | 0.08            | 0.00            | 0.16            | 0.23                 | 0.60                | 0.09                 | 0.07                 |
| BeH <sub>3</sub> Xe <sup>+</sup> | 1.24            | -0.53          | 0.08            | -0.01           | 0.22            | 0.30                 | 0.59                | 0.08                 | 0.07                 |
| BeH <sub>3</sub> Rn <sup>+</sup> | 1.22            | -0.53          | 0.07            | -0.01           | 0.25            | 0.57                 | 0.58                | 0.08                 | 0.07                 |

**Figure S1.** Bond paths for all systems studied in this work. Computed at the CCSD/def2-TZVP level.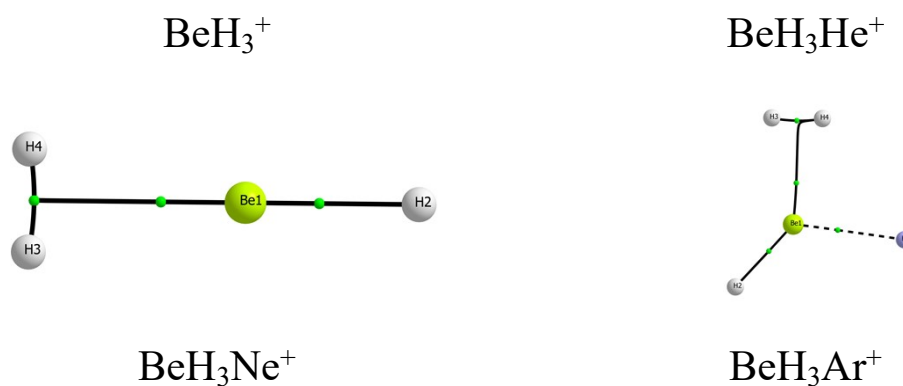

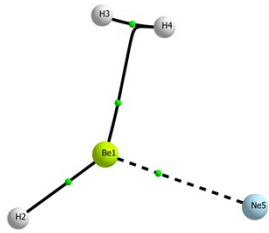

BeH<sub>3</sub>Kr<sup>+</sup>

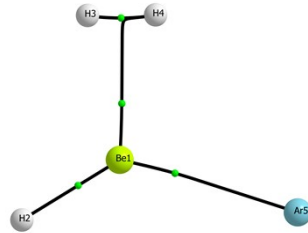

BeH<sub>3</sub>Xe<sup>+</sup>

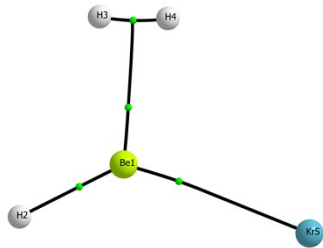

BeH<sub>3</sub>Rn<sup>+</sup>

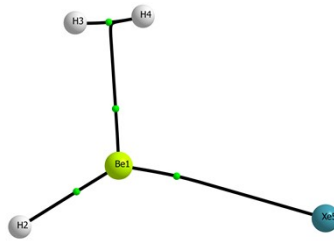

### Cartesian Coordinates

|                                      |              |              |              |                                      |              |              |             |
|--------------------------------------|--------------|--------------|--------------|--------------------------------------|--------------|--------------|-------------|
| <b>BeH<sub>3</sub><sup>+</sup></b>   |              |              |              | <b>BeH<sub>3</sub>He<sup>+</sup></b> |              |              |             |
| Be                                   | 0.00000000   | 0.00000000   | 0.279852315  | Be                                   | 0.00000000   | 0.356822026  | 0.00000000  |
| H                                    | 0.00000000   | 0.00000000   | 1.591869381  | H                                    | -0.285066020 | 1.631370119  | 0.00000000  |
| H                                    | 0.00000000   | 0.387784045  | -1.355639318 | H                                    | 1.528920112  | -0.312431023 | 0.00000000  |
| H                                    | 0.00000000   | -0.387784045 | -1.355639318 | H                                    | 1.079698079  | -0.940810070 | 0.00000000  |
|                                      |              |              |              | He                                   | -1.161776085 | -0.902708065 | 0.00000000  |
| <b>BeH<sub>3</sub>Ne<sup>+</sup></b> |              |              |              | <b>BeH<sub>3</sub>Ar<sup>+</sup></b> |              |              |             |
| Be                                   | 0.128230009  | 1.063157078  | 0.000000000  | Be                                   | 0.088397000  | 1.435405000  | 0.000000000 |
| H                                    | 1.201846084  | 1.807948131  | 0.000000000  | H                                    | 1.064141000  | 2.308093000  | 0.000000000 |
| H                                    | -1.440355103 | 1.650723120  | 0.000000000  | H                                    | -1.391060000 | 2.233129000  | 0.000000000 |
| H                                    | -1.556714110 | 0.888054062  | 0.000000000  | H                                    | -1.617820000 | 1.498050000  | 0.000000000 |
| Ne                                   | 0.128230009  | -0.859935059 | 0.000000000  | Ar                                   | 0.088397000  | -0.654494000 | 0.000000000 |
| <b>BeH<sub>3</sub>Kr<sup>+</sup></b> |              |              |              | <b>BeH<sub>3</sub>Xe<sup>+</sup></b> |              |              |             |
| Be                                   | 0.051398004  | 1.823579133  | 0.000000000  | Be                                   | 0.036089003  | 2.102272152  | 0.000000000 |
| H                                    | 1.010406070  | 2.716907198  | 0.000000000  | H                                    | 0.981399071  | 3.013210219  | 0.000000000 |
| H                                    | -1.408759104 | 2.652590190  | 0.000000000  | H                                    | -1.407351101 | 2.974445213  | 0.000000000 |
| H                                    | -1.657573119 | 1.925272141  | 0.000000000  | H                                    | -1.667221120 | 2.250863160  | 0.000000000 |
| Kr                                   | 0.051398004  | -0.405252029 | 0.000000000  | Xe                                   | 0.036089003  | -0.308289022 | 0.000000000 |
| <b>BeH<sub>3</sub>Rn<sup>+</sup></b> |              |              |              |                                      |              |              |             |
| Be                                   | 0.023769000  | 2.272835000  | 0.000000000  |                                      |              |              |             |
| H                                    | 0.955877000  | 3.199249000  | 0.000000000  |                                      |              |              |             |
| H                                    | -1.413411000 | 3.161464000  | 0.000000000  |                                      |              |              |             |
| H                                    | -1.681712000 | 2.441038000  | 0.000000000  |                                      |              |              |             |
| Rn                                   | 0.023769000  | -0.208059000 | 0.000000000  |                                      |              |              |             |
